# Proteome-wide Mendelian randomization identifies candidate causal proteins for cardiovascular diseases

Chen Li<sup>1</sup>, Nicolas De Jay<sup>1</sup>, Supriya Sharma<sup>1</sup>, Katrina A. Catalano<sup>1</sup>, Emily R. Holzinger<sup>1</sup>, Venkatesh Sridharan<sup>2</sup>, Zhaoqing Wang<sup>3</sup>, Lei Zhao<sup>2</sup>, Joseph D. Szustakowski<sup>1</sup>, Ching-Pin Chang<sup>2</sup>, Joseph C. Maranville<sup>1</sup>, Erika M. Kvikstad<sup>1</sup>

1. Informatics and Predictive Sciences, Bristol-Myers Squibb, USA
2. Immunology and Cardiovascular Thematic Research Center, Bristol-Myers Squibb, USA
3. Translational Medicine, Bristol-Myers Squibb, USA

## Abstract

### Background:

Cardiovascular diseases (CVD) remain the leading cause of death worldwide, while a lack of clarity on underlying mechanisms has hindered development of novel therapies. Integration of human genetics and proteomics across different ancestries can provide novel, affordable, and systematic approach for target identification and prioritization.

### Methods:

Mendelian randomization approach was applied to unravel causal associations between 2,940 circulating proteins and 21 CVD. Genome-wide summary statistics from the largest genetic mapping of human plasma proteome and meta-analyses on CVD across FinnGen, UK Biobank and Biobank Japan were used. Forward and reverse causation were studied to distinguish respective targets and biomarkers. Genetic instruments for Europeans and East Asians were derived separately and applied to the cardiovascular outcomes in cohorts from corresponding ancestries. We further prioritized drug targets by integrating biological, clinical and population study evidence from cross-database annotations and literature review. Single-cell enrichment analysis and phenome-wide causality scan were performed to further understand target mechanism of action.

### Results:

We found 221 novel candidate causal proteins that impacted risk of one or more CVD through forward MR, and 16 biomarkers whose expression levels were affected by CVD through reverse MR (Bonferroni-adjusted  $P$ -value  $\leq 0.05$ ). Forward and reverse MR found largely non-overlapping proteins among CVD (only 2 overlapped: LGALS4 and MMP12), suggesting distinct proteomic causes and consequences of CVD. Many of the candidate causal proteins (73.4%) identified are supported by strong literature evidence for a role in immune response and atherosclerotic lesion formation, angiogenesis and vascular remodeling, myogenesis and cardiac progenitor cell differentiation, and energy metabolism. Single cell integration further prioritized ADAM23 for cardiomegaly, PAM for stable angina pectoris and ventricular arrhythmia and LPL for peripheral artery disease, whose transcript expression were enriched in cardiomyocytes. Three protein functional groups were highlighted in the phenome-wide scan for their specific

enrichment for CVD, including blood coagulation and fibrinolysis, angiogenesis and vascular remodeling, and cell proliferation and myogenesis.

#### Conclusions:

Our study identified potential therapeutic targets for CVD and distinguished them from biomarkers due to reverse causation. This study provides human genetics-based evidence of novel candidate genes, a foundational step towards full-scale causal human biology-based drug discovery for CVD.

## 1 Introduction

2  
3 Recent development in novel therapeutic treatments for cardiovascular disease (CVD) has  
4 helped to improve survival and reduce hospitalization of patients.<sup>1,2</sup> Despite this progress, CVD  
5 remains the leading cause of death across ancestries and geographies.<sup>3</sup> Innovation and  
6 investments in developing new therapies for CVD have successfully driven discovery of many  
7 novel drugs, including some first- or best-in-class therapies, such as mavacamten, a targeted  
8 inhibitor of cardiac myosin, for treatment of patients with obstructive hypertrophic  
9 cardiomyopathy;<sup>4</sup> inhibitors of SGLT2 (dapagliflozin, empagliflozin) to treat heart failure  
10 regardless of left ventricle ejection fraction and diabetes comorbidity,<sup>5-7</sup> vericiguat, a stimulator  
11 of sGC, to treat heart failure patients with reduced ejection fraction;<sup>8</sup> inhibitors of PCSK9  
12 (alirocumab, evolocumab) for hypercholesterolemia and atherosclerotic CVD.<sup>9,10</sup> However, in  
13 recent years, the number of drugs entering all phases of clinical trials and drugs approved by  
14 regulatory bodies (including the US Food and Drug Administration) for CVD has declined,  
15 especially when comparing to drugs in other therapeutic areas, such as oncology.<sup>11</sup> This is  
16 possibly due to a relatively higher cost of trials, as cardiovascular trials are often larger in size  
17 and longer in duration to manifest primary endpoints that satisfy regulatory requirements.<sup>12</sup>  
18 The challenges confronted in cardiovascular drug development call for new approaches to  
19 increase accuracy and efficiency of trials at lower costs, and studies have shown drug targets  
20 with robust human genetic evidence are more likely to be successful in clinical trials.<sup>13</sup>  
21  
22 Recent advances in omics technologies provide opportunities to discover novel therapeutic  
23 strategies in an unbiased, rapid, and cost-effective manner. High throughput immunoaffinity-  
24 based proteomics platform is emergingly applied to systematically quantify protein abundance  
25 in large cohorts.<sup>14</sup> Deep profiling of circulating proteins with integration of genomics in a large  
26 population cohort allows us to understand proteins associated with disease at an  
27 unprecedented scale with the possibility of unraveling novel pathways involved in CVD  
28 pathogenesis. Observational studies have shown cross-sectional associations between proteins  
29 and certain CVD,<sup>15</sup> but causal relationships are unclear due to potential confounding effects and

30 reverse causations. Genome-wide association studies (GWAS) of circulating proteins identify  
31 genetic variants that regulate protein levels in plasma, which can be used as instrumental  
32 variables (IVs) to infer causality under the framework of Mendelian randomization (MR).

33  
34 Studies have demonstrated the feasibility of MR methodology in identifying protein targets for  
35 CVD but are often restricted to a small number of targeted proteins, one or a few CVD and one  
36 ancestry population.<sup>16-18</sup> In this study, we leveraged the largest genetic mapping of circulating  
37 proteome that has recently been published as a public data resource, which measures 2,940  
38 proteins in up to 50,000 individuals in UK Biobank,<sup>19</sup> to systematically identify disease  
39 associations across 21 CVD ranging from rare conditions of myocarditis and cardiomyopathy to  
40 common conditions of heart failure and ischemic stroke. To distinguish targets of protein  
41 expression levels affecting disease risks and biomarkers that vary protein expressions as  
42 consequences of diseases, we conducted forward and reverse MR to delineate bi-directional  
43 causality. We prioritized newly identified targets and biomarkers with further evidence from  
44 cross-database evaluation of pathophysiological function and clinical implication and analyzed  
45 potential therapeutic and adverse effects on a wide spectrum of diseases to respectively show  
46 opportunities for drug repurposing and caveats for safety issues.

47

## 48 **Methods**

49

### 50 **Study Overview**

51

52 Figure 1 summarizes the overview of our study design – data processing and analysis workflow.  
53 The study consists of two parts, the primary analysis, a bi-directional MR that disentangle causal  
54 relationships between proteins and CVD, and secondary analyses to strengthen evidence for  
55 target prioritization, including single cell integration to assess cell-type enrichment of targets  
56 prioritized and differential gene expression between cardiomyopathy and healthy cardiac cell  
57 types; manual curation of biological functions and cross-database annotation of protein

58 druggability and disease association; a phenome-wide MR scan to assess pleiotropy and  
59 specificity of targets and biomarkers across disease categories.

60

## 61 **MR analyses**

62

63 Various methods have been developed to conduct MR with different capabilities in type I and  
64 type II error control, and degrees of tolerance to invalid instruments.<sup>20</sup> We used the inverse  
65 variance weighted MR as the primary method because of its conceptually simple design and  
66 relatively greater power to detect less significant but true positive results, and other robust  
67 methods as sensitivity analyses, including MR Egger, median weighted and mode weighted MR.

68

### 69 *Forward-MR*

70

71 Forward MR investigated causal roles of proteins on CVD risk, where proteins are exposures and  
72 CVD are outcomes. IVs for proteins are derived from summary statistics from the largest GWAS  
73 of plasma proteins, where genetic associations were assessed with 2,940 plasma proteins in  
74 ~54,000 UK Biobank participants, of which 34,557 participants are of European ancestry and  
75 262 participants are East Asians.<sup>19</sup> Independent lead variants (also known as protein  
76 quantitative trait loci, or pQTLs) with  $p$ -values less than  $5 \times 10^{-8}$  were selected as IVs for  
77 European and East Asian (Linkage disequilibrium (LD) clumped variants in  $LD R^2 < 0.1$  with each  
78 other and located within 500kb around lead variants) cohorts separately. LD was calculated  
79 based on a randomly selected subset of Caucasian ( $n = 10,000$ ) or all East Asian ( $n = 2,783$ )  
80 participants in the UK Biobank for Europeans and East Asians, respectively.<sup>21</sup> For IVs absent from  
81 the CVD GWAS datasets, we found the best proxies available ( $p$ -values  $< 5 \times 10^{-8}$ , in  $LD R^2 > 0.7$   
82 with index variants, and within 500kb distance from the index variants). We assessed *cis*- and  
83 *trans*-pQTLs as IVs separately. *cis*-pQTLs are defined as genetic variants within 1Mb on either  
84 side of the start and the stop codon of a protein-coding gene. Proteins that significantly affected  
85 CVD risk with Bonferroni-adjusted  $P$  value  $< 0.05$  (Bonferroni adjust for the total number of  
86 proteins and diseases tested) were identified as target candidates and followed-up with

87 downstream analyses of multi-trait colocalization, cross-database protein annotation and  
88 phenome-wide MR scan.

89

90 *Reverse-MR*

91

92 Reverse MR studies protein level changes caused by CVD incidence, where diseases are  
93 exposures and proteins are outcomes. IVs for CVD are independent lead variants (LD clumped  
94 variants with  $p$ -value  $< 5 \times 10^{-8}$ , in LD  $R^2 < 0.1$  between each other and located within 500kb  
95 around lead variants) derived from summary statistics of GWAS on 21 CVD where CVD are  
96 identified by ICD-10 and phecode in Europeans (UK Biobank and FinnGen meta-analysis,  $n =$   
97 449,000) and East Asians (Biobank Japan,  $n = 179,000$ ). IV definitions for all CVD are based on  
98 the GWAS meta-analyses in respective cohorts,<sup>22</sup> except for hypertrophic and dilated  
99 cardiomyopathy, a more cardiomyopathy-focused GWAS with greater statistical power was used  
100 for Europeans for these 2 relatively rare cardiovascular disorders.<sup>23</sup> Ancestry-specific LD was  
101 estimated in corresponding cohorts as illustrated in the Forward-MR analysis. For IVs absent  
102 from the proteomics GWAS datasets, we found the best proxies available using the same criteria  
103 as described in the forward-MR analysis. Proteins that are significantly affected by CVD  
104 (Bonferroni-adjusted  $P$  value  $< 0.05$ , Bonferroni adjust for the total number of proteins and  
105 diseases tested) are identified as potential biomarkers and compared against significant results  
106 from the forward-MR to rule out reverse causation.

107

108 **Cross-database protein annotation**

109

110 Protein biological functions are annotated with cross-referencing multiple databases, including  
111 UniProt and RefSeq. We also annotated protein druggability by interrogating Drug-Gene-  
112 Interaction (DGI) database,<sup>24</sup> ChEMBL v33,<sup>25</sup> PharmGKB,<sup>26</sup> and DrugCentral Postgres v14.5<sup>27</sup>  
113 databases to find therapeutic targets of approved or under clinical development. To evaluate  
114 protein associations with diseases, we queried GWAS Catalog<sup>28</sup> for population-level evidence, as  
115 well as ClinVar<sup>29</sup> and ClinGen<sup>30</sup> for clinically suggested implications.

116

## 117 **Phenome-wide MR scan**

118

119 We ran MR to disentangle bi-directional causal relationships between 2,940 proteins and 159  
120 disease outcomes in European and East Asian cohorts separately. For East Asian cohort, an  
121 additional 38 quantitative biomarkers and 23 medication usage phenotypes were tested.  
122 Diseases were defined by ICD-10 and phecode by a previous GWAS meta-analysis in UK Biobank,  
123 FinnGen and Biobank Japan, where detailed description of the 3 cohorts and disease definitions  
124 are shown.<sup>22</sup> The diseases cover a wide range of categories, with an average of 8 diseases  
125 representing each category. Significant results from forward- and reverse-MR are followed up  
126 with the phenome-wide MR scan to detect off-targets effects and opportunities for drug  
127 repurposing. Diseases that have  $\geq 50$  cases were included in the forward- and reverse-MR  
128 analyses and at least one genome-wide significant locus in the reverse-MR analysis. Enrichment  
129 was assessed via the over representation analysis to determine whether a protein functional  
130 group (G) was over-represented in a disease category (D), and enrichment *P* value was  
131 calculated under hypergeometric distribution using the formula:  $P = 1 - \sum_{i=0}^{k-1} \frac{\binom{M}{i} \binom{N-M}{n-i}}{\binom{N}{n}}$ , where N  
132 is the product of the total number of diseases across disease categories and the total number of  
133 proteins in G, M is the product of the total number of diseases in D and the total number of  
134 proteins in G, n is the number of significant protein signals in G across disease categories, and k  
135 is the number of significant protein signals in G and D. Enrichment significance threshold is  
136 Bonferroni-corrected for the total number of protein functional groups and the total number of  
137 disease categories.

138

## 139 **Single-cell analysis**

140

141 To link circulating proteins to proteins enriched in cell types originating in the heart tissues or  
142 demonstrate specificity for cardiomyopathy vs healthy hearts, we analyzed cell type enrichment  
143 for significant genetic signals from MR analyses using single-cell RNA sequencing data from left

144 ventricular samples and assessed differential gene expression between cardiomyopathy and  
145 healthy hearts.

146

#### 147 *Single-cell RNA sequencing data curation*

148

149 We curated publicly available single-cell RNA sequencing data from a recently published cohort  
150 of 42 human left ventricular samples (11 DCM, 15 HCM, 16 non-failing hearts).<sup>31</sup> Cell and cell-  
151 type metadata, and gene counts adjusted for ambient RNA were retrieved from the Broad  
152 Institute's Single Cell Portal (accession SCP1303). Cell-type enrichment and differential gene  
153 expression data were retrieved from figure source data or supplementary tables of the  
154 corresponding publication.

155

#### 156 *Cell-type enrichment*

157

158 To determine whether a gene exhibited significantly enriched expression in one or more cell  
159 types, pseudobulk profiles were generated from healthy and patient donors.<sup>31</sup> A gene was  
160 considered to be enriched for a cell type if it satisfies the following criteria: (1) the gene expression  
161 was > 4X higher for the cell type compared to the other cell types (one *versus* rest) with  $FDR_{BH}$ -  
162 adjusted  $P$ -value < 0.01, (2) at least 25% of nuclei in the cell type expressed the gene, and (3) a  
163 classifier trained on the gene expression predicted whether a nucleus belongs to the cell type  
164 with  $AUC > 0.6$ . For visualization, we included genes if their expression were significantly enriched  
165 in at least one cell type and sorted them according to (1) the cell type in which nuclei displayed  
166 the highest average expression, (2) the average Gini coefficient calculated from the average nuclei  
167 expression and the percentage of nuclei expressing that gene.

168

#### 169 *Differential gene expression between cardiomyopathy and healthy hearts*

170

171 Chaffin et al. analyzed pseudobulk profiles using a limma-voom model regressing gene expression  
172 in each cell type on a disease group (HCM vs control and DCM vs control) adjusted for age and



173 sex. A gene was differentially expressed if the expression was 50% higher in the cardiomyopathy  
174 than non-failing cardiac cell types with a  $FDR_{BH}$ -adjusted  $P$ -value  $< 0.01$ .<sup>31</sup>

175

## 176 **Analysis software**

177

178 All analyses were performed using the statistical software R (Version 4.1.3). We used the PLINK  
179 1.9 beta and 2.0 alpha (<https://www.cog-genomics.org/plink/>) to generate LD matrix for each  
180 ancestry and perform LD clumping, the TwoSampleMR R package  
181 (<https://github.com/MRCIEU/TwoSampleMR>) to perform MR analyses,<sup>32</sup> and the Seurat (  
182 <https://satijalab.org/seurat/>) and the edgeR R packages to perform single cell analyses.<sup>33,34</sup>

183

## 184 **Ethical Statement**

185

186 The MR analyses were based on publicly available GWAS summary statistics and ancestry-  
187 specific LD matrices were estimated using UK Biobank individual-level data (Applications 26041  
188 and 65851). The included GWAS all received informed consent from study participants and have  
189 been approved by pertinent local institutional review board.

190

## 191 **Results**

192

### 193 **Target discovery with forward-MR – causal effects of proteins on each CVD risk**

194

195 In the forward-MR analysis in European ancestry, 221 proteins significantly affect at least one  
196 CVD risk ( $P$ -value  $< 1.27 \times 10^{-7}$  or  $2.09 \times 10^{-7}$  using *trans*- or *cis*-pQTL as instrumental variables,  
197 respectively), which spanned multiple Olink panels, including cardiometabolic, inflammation,  
198 neurology, and oncology panels (Figure 2). Up to 60% significant proteins affected only one CVD,  
199 while several proteins were causally associated with a highly pleiotropic set of diseases across  
200 CVD (Figure 2), such as LPA with angina pectoris, atrial fibrillation, ventricular arrhythmia,  
201 myocardial infarction, peripheral arterial disease, ischemic stroke, cardiac valvular disease, and

202 cardiomegaly, possibly through dual pathological attributes of lipoprotein(a) in procoagulant  
203 effects of apo(a) and atherogenic and proinflammatory effects of oxidized apoB-related  
204 phospholipids.<sup>35</sup> Studies suggested LPA as an emerging therapeutic target for reducing  
205 lipoprotein(a) levels, thereby lowering risks of atherosclerotic CVD independent of lowering  
206 low-density lipoprotein cholesterol levels,<sup>36</sup> with positive results reported by several ongoing  
207 clinical trials.<sup>37</sup> Most of the targets identified were novel, while several established targets for  
208 cardiovascular complications were also been found, including PCSK9 for myocardial infarction,  
209 stroke, and coronary revascularization, ANGPTL3 for reducing low-density lipoprotein  
210 cholesterol, and ECE1 for congestive heart failure and hypertension (Table S1). Many of the  
211 targets (62%) identified are supported by strong literature evidence for a role in immune  
212 response and atherosclerotic lesion formation, angiogenesis, and vascular remodeling,  
213 myogenesis and cardiac progenitor cell differentiation, and energy metabolism (Table S2). Full  
214 forward MR results are provided in Table S4.

215

#### 216 **Biomarker discovery with reverse-MR – causal effects of CVD on each protein level**

217

218 We identified 16 biomarkers in total, among which 5 were from the East Asian analyses (ERBB3,  
219 SIRT5, CXCL13, SUSP5, TTR) shown in Table S5 and Figure 3. Of note, ERBB3, a member of  
220 membrane-bound tyrosine kinase receptor family that activates cell proliferation and  
221 differentiation, found only in the East Asian population, has recently been shown to have  
222 cardioprotective effects on cardiomyocyte survival and angiogenesis under stress.<sup>38</sup> Genetic  
223 polymorphisms of ERBB3 were reported to be associated with coronary artery disease in Han  
224 and Uygur ancestries of China,<sup>39</sup> and circulating protein levels with overweight-related  
225 hypertension in the same population.<sup>40</sup> Only 2 biomarkers (LGALS4, MMP12) were overlapped  
226 with the targets derived from the forward-MR analyses (Table S5), suggesting distinct roles of  
227 proteins on CVD pathogenesis. We also found NPPB, the gene encoding preprohormone  
228 (propro-B-type natriuretic peptide, preproBNP) in cardiomyocytes, as a biomarker specifically to  
229 dilated cardiomyopathy. The preproBNP is cleaved into proBNP, and then further processed into  
230 2 circulating fragments -- the biologically active BNP and the inactive N-terminal proBNP, both of

231 which are routinely used in clinical diagnosis and treatment management in heart failure.  
232 Studies have suggested that BNP may play different roles in heart failure with preserved and  
233 reduced ejection fraction (HFpEF and HFrEF, respectively),<sup>41</sup> and BNP or NT-proBNP were less  
234 effective biomarkers for HFpEF due to their average lower values in HFpEF than in HFrEF, which  
235 dropped into a normal range in some patients.<sup>42</sup> Our finding is consistent with these studies  
236 that BNP-related biomarkers are mainly indicative for heart diseases with reduced left ventricle  
237 ejection fraction.

238

### 239 **Phenome-wide MR screening for specificity and pleiotropy of targets and biomarkers**

240

241 We expanded our analysis to evaluate all proteins and all diseases in the forward and reverse  
242 MR across the two ancestries to assess pleiotropy and specificity of targets and biomarkers  
243 that trigger or respond to one or multiple diseases (Table S6). For targets, 38 out of 190 targets  
244 (trans-forward-MR) were specific to one disease and 51 to one disease category; for biomarkers,  
245 4 out of 16 biomarkers were specific to one disease and the diseases were all in the  
246 cardiovascular category, such as NPPB specific to dilated cardiomyopathy. Several functional  
247 groups showed significant enrichment for their causality on CVD and not the other disease  
248 categories, including blood coagulation and fibrinolysis (enrichment P-value =  $3.54 \times 10^{-7}$ ),  
249 angiogenesis and vascular remodeling ( $2.29 \times 10^{-6}$ ), and cell proliferation and myogenesis ( $2.38$   
250  $\times 10^{-5}$ ). Full enrichment results of protein functional group across disease categories are shown  
251 in Table S7. To assess pleiotropy, 37.8% (14 out of 37) proteins in the functional group of  
252 immune and inflammatory response exerted significant causal effects on at least 20 different  
253 diseases across disease categories, whereas in the other top 10 largest functional groups, there  
254 was  $\leq 1$  protein implicated with  $\geq 20$  diseases. The pleiotropic signature of the immune and  
255 inflammatory response group was consistent when altering the pleiotropy threshold to 15, 10  
256 or 5 proteins (Table S8), suggesting involvement of this functional group in the pathogenesis of a  
257 variety of diseases. Apart from this group, several other proteins of different functional groups  
258 showed extensive pleiotropy, such as CTSB and MST1 in regulating autophagy and apoptosis,  
259 and TNXB in mediating cell-cell and cell-matrix interaction. Biomarkers were associated with a

260 smaller number of diseases on average than targets (mean [SD]: 4.56 [3.29] vs 8.71 [12.28]),  
261 and they were not enriched for any disease categories (Figure 4).

262

### 263 **Single-cell integration elucidates cell context-dependent mechanisms of targets**

264

265 To gain insights into possible cell context-dependent mechanisms of these targets and  
266 biomarkers, we examined their gene expression patterns along major cardiac cell types of the  
267 left ventricle identified in a recently published single-cell late-stage DCM and HCM heart atlas.<sup>31</sup>  
268 Fifty-four out of 235 proteins (22%) had significantly enriched gene expression in at least one  
269 major cardiac cell population (Figure 5A). The enriched cell types of each protein were in line  
270 with its biological functions (Figure 5B). For example, ADAM23, a protein involved in cell-cell  
271 and cell-matrix interactions and cardiac remodeling had significantly elevated expression in  
272 cardiomyocytes relative to other cell types. Cardiac-specific conditional knockout of Adam23 in  
273 mice exhibited cardiac hypertrophy and fibrosis, whereas transgenic mice overexpressing  
274 Adam23 in the heart exhibited reduced cardiac hypertrophy in response to pressure overload.<sup>43</sup>  
275 ADAM23 was a significant causal signal in both cis- and trans-MR, specifically for cardiomegaly,  
276 while other paralogs in the ADAM protein family, such as ADAM15 and ADAM9, were more  
277 pleiotropic, broadly affecting a highly heterogeneous spectrum of diseases. *PAM*, a known  
278 marker of cardiomyocytes encoding the major atrial membrane protein involved in proANP  
279 containing secretory granule biosynthesis, was enriched in cardiomyocytes. Similarly, *LPL*, which  
280 encodes a key enzyme in hydrolysis of triglyceride and catabolism of triglyceride-rich  
281 lipoprotein, was significantly elevated in cardiomyocytes and adipocytes. Mislocalization of LPL  
282 to the cell surface of cardiomyocytes has been associated with cardiomyopathy pathogenesis in  
283 mice.<sup>44</sup> Our findings suggest that cell-type-dependent mechanisms of targets emerge as  
284 compelling focal points for potential therapeutic hypotheses development.

285

286 Next, we investigated whether our prioritized targets were differentially expressed in  
287 cardiomyopathy and healthy donor heart biopsies in a cell-type specific manner. Indeed, 102  
288 proteins (43.4%) were differentially expressed at the transcriptional level in at least one cardiac

289 cell type (Figure 5D). *NPPB* showed significantly higher expression in cardiomyocytes from DCM,  
 290 but not HCM, than non-failing hearts (Figure 5C). *FURIN*, mediating proteolytic cleavage of non-  
 291 functional proBNP to its active hormone BNP, expressed at a significantly lower level in  
 292 fibroblasts, endothelial cells and macrophages from DCM than non-failing hearts, suggesting  
 293 agonists of *FURIN* may help restore cardioprotective activity of BNP in DCM.

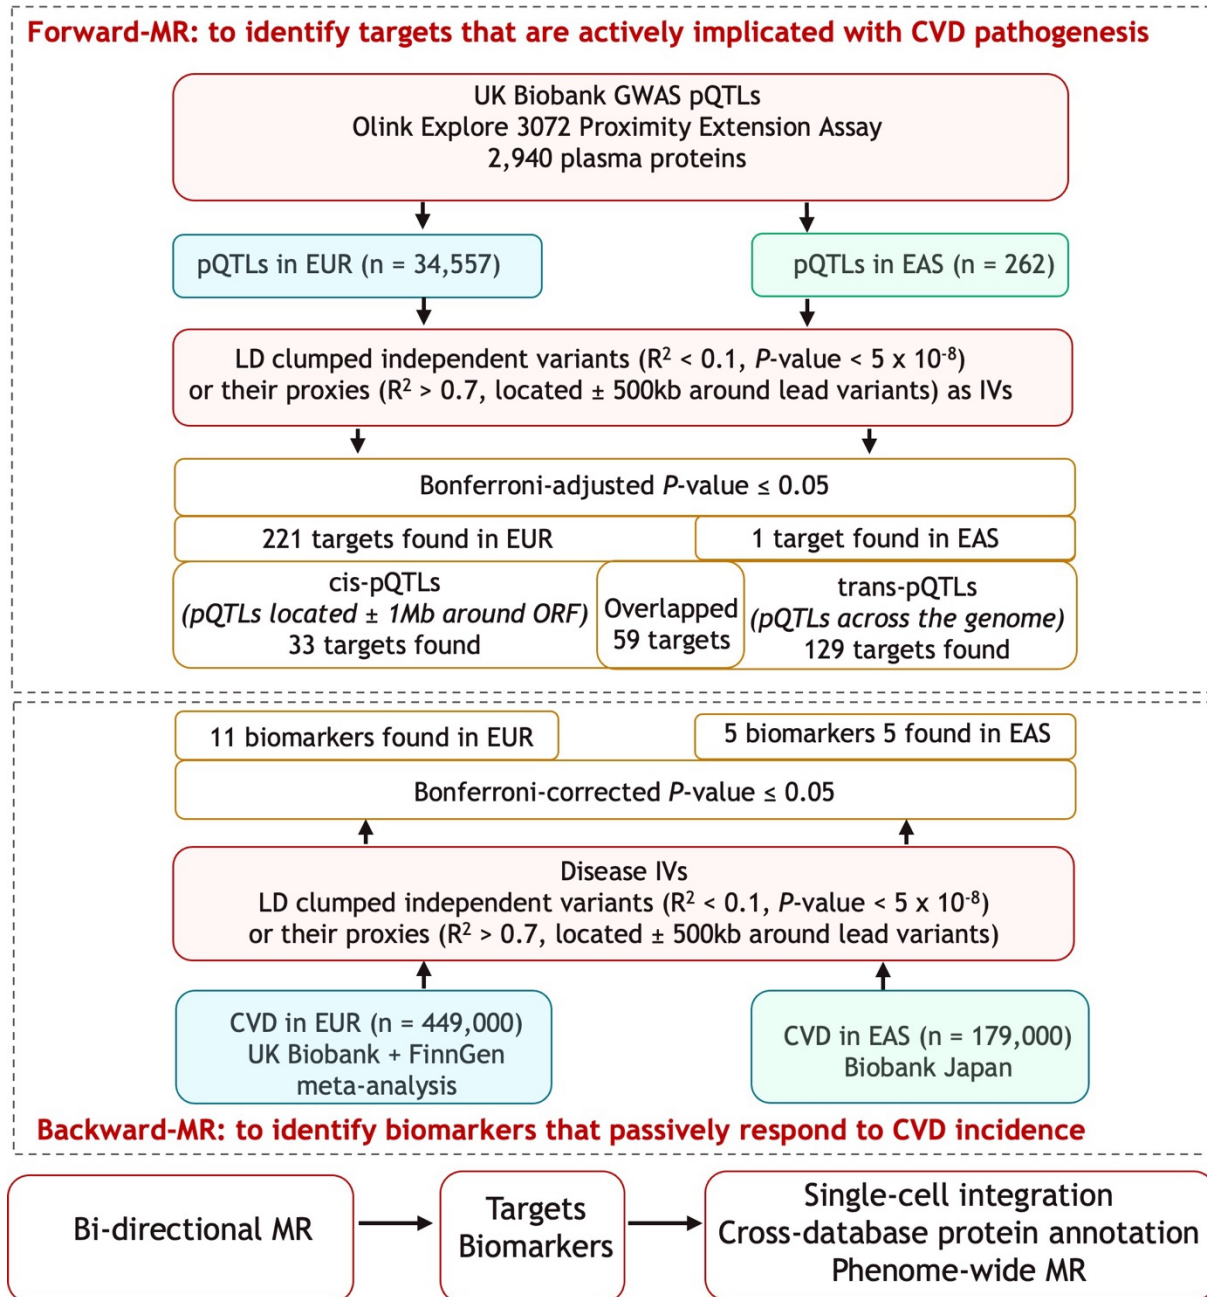



299

A

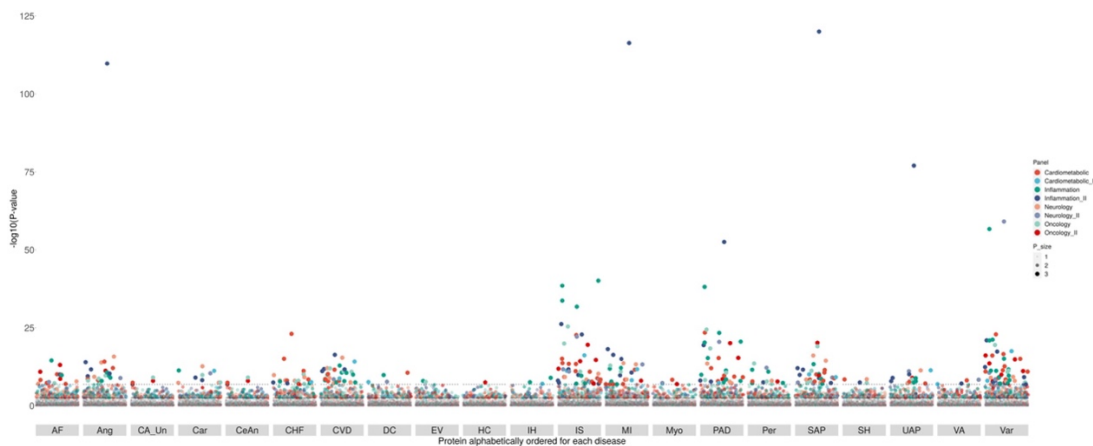

300

301 B

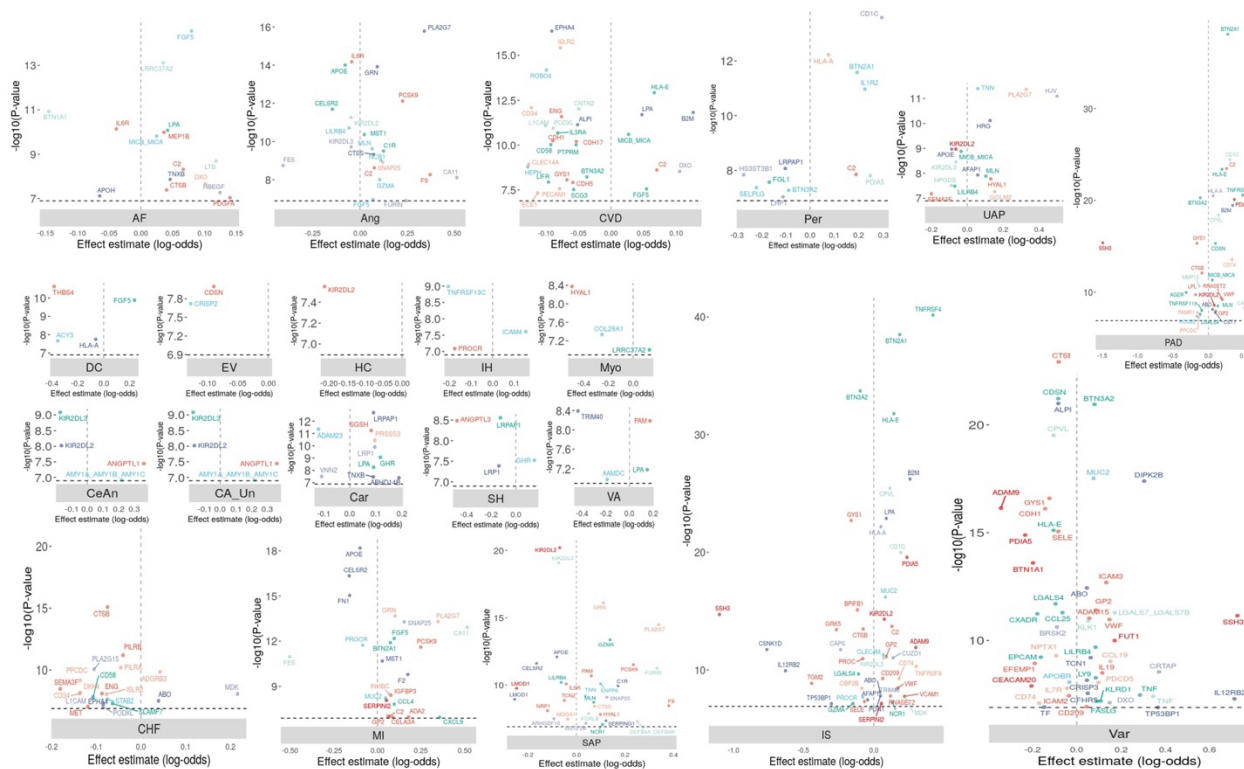

302

303 C

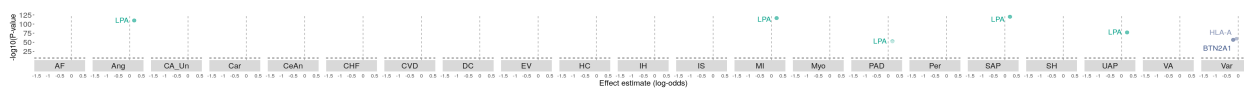

304

305 **Figure 2. Discovery of targets – circulating proteins that are implicated with pathogenesis of cardiovascular disease**  
 306 **ses (CVD).** Forward-MR results using trans-pQTLs as instrumental variables and inverse variance weighted method i  
 307 n the European ancestry are shown. A. Proteome-wide Manhattan plot – causal association of each protein with ea  
 308 ch CVD.  $-\log_{10}(P\text{-value})$  was plotted as Y-axis and protein name in alphabetical order as X-axis for each CVD. Color la  
 309 bels the Olink Panel that each protein belongs to and size labels significant levels, which was categorized into 3 gro  
 310 ups: groups 1,2 and 3 corresponding to  $P$ -value  $\geq$  FDR<sub>BH</sub> threshold of 0.05,  $P$ -value between Bonferroni-corrected a

311 nd FDR<sub>BH</sub> thresholds of 0.05 and *P*-value < Bonferroni-corrected threshold of 0.05. Significant causal associations for  
 312 each CVD were shown in the panels B (*P*-value > 1 × 10<sup>-50</sup>) and C (*P*-value ≤ 1 × 10<sup>-50</sup>). Effect coefficient β was plot  
 313 ted as X-axis and -log<sub>10</sub>(*P*-value) as Y-axis. Dashed vertical line indicates β = 0. Each dot was labeled with protein na  
 314 me abbreviation colored by the corresponding protein Olink Panel. Ang: Angina pectoris, AF: Atrial flutter/fibrillatio  
 315 n, CVD: Cardiac valvular disease, Car: Cardiomegaly, CeAn: Cerebral aneurysm, CHF: Chronic heart failure, DC: Dilat  
 316 ed cardiomyopathy, EV: Esophageal varix, HC: Hypertrophic cardiomyopathy, IH: Intracerebral hemorrhage, IS: Ische  
 317 mic stroke, MI: Myocardial infarction, Myo: Myocarditis, Per: Pericarditis, PAD: Peripheral arterial disease, SAP: Stab  
 318 le angina pectoris, SH: Subarachnoid hemorrhage, CA\_Un: Unruptured cerebral aneurysm, UAP: Unstable angina pe  
 319 ctoris, Var: Varicose, VA: Ventricular arrhythmia.  
 320  
 321

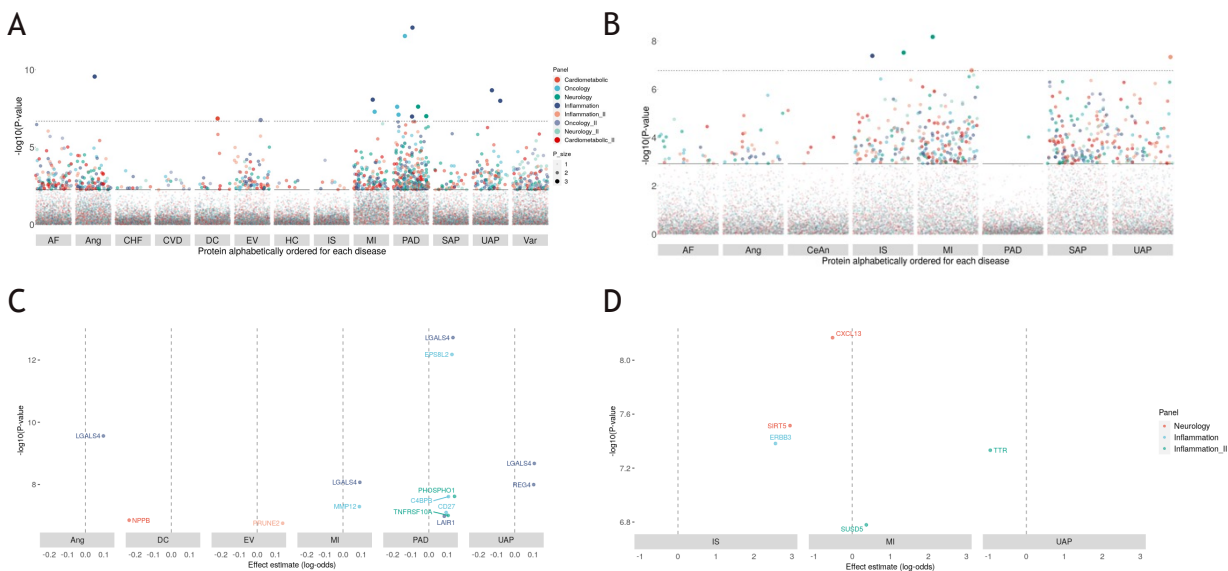

322  
 323 **Figure 3. Discovery of biomarkers – circulating proteins that respond to cardiovascular disease (CVD)**  
 324 **development.** Reverse-MR results using inverse variance weighted method across ancestries are shown. Proteome-  
 325 wide Manhattan plot – causal effect of each CVD on each protein in the panel A (European) and B (East Asian)  
 326 ancestries. CVD that had at least one genome-wide significant variant association were shown. Significant causal  
 327 associations for each CVD were shown in the panels C (European) and D (East Asian). CVD that had causal effects  
 328 on at least one protein were shown. Figures were represented in the same manner as in the Figure 2. AF: Atrial  
 329 flutter/fibrillation, Ang: Angina pectoris, CHF: Chronic heart failure, CVD: Cardiac valvular disease, CeAn: Cerebral  
 330 aneurysm, DC: Dilated cardiomyopathy, EV: Esophageal varix, HC: Hypertrophic cardiomyopathy, IS: Ischemic  
 331 stroke, MI: Myocardial infarction, PAD: Peripheral arterial disease, SAP: Stable angina pectoris, UAP: Unstable  
 332 angina pectoris, Var: Varicose.  
 333







354 D

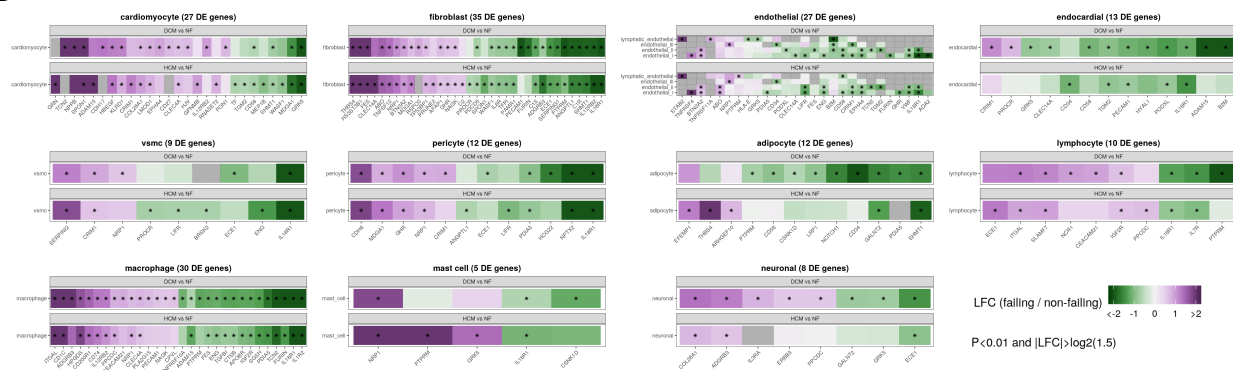

355  
356

357 **Figure 5. Enrichment of gene expression across different cell types in left ventricle biopsies.** A. Overall enrichment  
358 across 42 left ventricle samples from 11 dilated cardiomyopathy (DCM), 15 hypertrophic cardiomyopathy (HCM)  
359 and 16 non-failing hearts combined. Proteins with significantly enriched gene expression in at least one cell type  
360 are shown. Average expression is scaled to center at 0 and capped to a range of -2.5 to 2.5 with a color gradient  
361 from yellow to purple. The percentage of nuclei expressing each gene is proportional to the size of the dots. The  
362 significant enrichment of gene expression ( $FDR_{BH}$ -adjusted  $P$ -value < 0.01) in cell types are highlighted with black  
363 circles around the dots. Dots are omitted for genes with less than 0.5% of nuclei within a cell type. B. Box plots of  
364 single-cell gene expression in  $\log_2$  counts per million (CPM) of ADAM23, PAM and LPL in each cell type.  $FDR_{BH}$ -  
365 adjusted  $P$ -values are reported only for genes in significantly enriched cell types. C. Box plots of single-cell gene  
366 expression ( $\log_2$ CPM) of NPPB and FURIN in non-failing, DCM and HCM heart samples stratified by cell types. Red  
367 asterisk highlights genes that are significantly differentially expressed in failing vs non-failing heart tissues. D.  
368 Differential gene expression in DCM or HCM vs non-failing heart samples stratified by cell types. The  $\log_2$  fold  
369 change (LFC) of gene expression is scaled to center at 0 and capped to a range of -2 to 2, corresponding to a range  
370 of 0.25 to 4 times difference in gene expression. The significant difference of gene expression is labeled with  
371 asterisk in the square box.

372

## 373 Discussion

374

### 375 Main Findings

376

377 Leveraging genetic IVs to infer causalities between circulating proteins and incident diseases in a  
378 proteome-wide and phenome-wide manner help to identify candidate drivers of disease and  
379 biomarkers at an unprecedentedly large scale. In this study, we integrated proteomics MR with  
380 single cell analysis to prioritize novel targets for CVD. We found 221 causal signals, the majority  
381 of which conform to known disease biology through pathways such as immune response and  
382 atherosclerotic lesion formation, angiogenesis and vascular remodeling, myogenesis and cardiac  
383 progenitor cell differentiation, and energy metabolism. Reverse-MR identified 16 biomarkers  
384 whose protein expressions were affected by disease status, 5 of which were exclusively found in

385 the East Asian population, demonstrating the value of multi-ancestry populations in identifying  
386 drug targets via genetic studies of molecular traits (omics). Only two of the targets were also  
387 biomarkers, the LGALS4 and the MMP12, suggesting distinct causes and consequences of  
388 circulating proteins on CVD. Some established targets for cardiovascular drugs approved or in  
389 clinical development have been found, such as PCSK9 inhibitors (bococizumab, alirocumab and  
390 evolocumab), ECE1 inhibitor (daglutril) and ANGPTL3 inhibitor (evinacumab), supporting the  
391 validity of our approach. About half of the candidate causal genes (112/235) have been linked  
392 to CVD or CVD-related risk factors in previous GWAS, genetic linkage or clinical studies, the rest  
393 of genes are implicated with CVD for the first time. Among the novel candidate causal genes to  
394 highlight, AGER, a member of the immunoglobulin superfamily of cell surface molecules, was  
395 linked to pathogenesis of atherothrombotic diseases, of which upregulated expression was  
396 found in human atherosclerotic plaques and polymorphisms associated with myocardial  
397 infarction and ischemic stroke;<sup>45</sup> SELE, the E-selectin, and SELPLG, a glycoprotein ligand that  
398 binds to the E-, P- and L-selectin, mediating recruitment of leukocytes on vascular surfaces  
399 during initial steps of inflammation, were shown to be involved in development of  
400 atherosclerosis and thrombosis with increased plasma protein levels observed in various CVD;<sup>46</sup>  
401 MDK, a secreted heparin-binding growth factor that regulates many biological processes,  
402 including cell proliferation, differentiation, migration and survival, was shown to have  
403 cardioprotective effects against ischemia and reperfusion injury via attenuating cardiomyocyte  
404 apoptosis.<sup>47</sup> Our findings provide evidence supporting therapeutic hypotheses underpinning 3  
405 established or under investigated cardiovascular drug targets and more broadly showcase the  
406 potential of large-scale integration of multi-omics in understanding causal human biology of  
407 complex disease for novel drug target discovery.

408

409 The values and limitations of bidirectionality in MR analyses

410

411 Observational studies found associations without a capability to distinguish causal and  
412 confounding and are often lack of ascertainment of directionality of associations. We applied a  
413 bi-directional MR approach to disentangle causal roles of circulating protein level changes on

414 disease risk – to discover targets, and changes on proteomic expression profiles under disease  
415 circumstances – to identify biomarkers. Distinct proteomic signatures were described as causes  
416 or consequences of different CVD, however, we were unable to distinguish disease incidence  
417 and progression, and thereby to assess proteomic changes underpinning disease progression  
418 due to limitations on disease outcome definitions from genome-wide meta-analyses. To achieve  
419 the full potential of bi-directional MR and characterize dynamic influence of proteomic changes  
420 along disease trajectories, a longitudinal GWAS on progression endpoints will be needed.  
421 MMP12 is a notable example, of which the mechanism of action can be further elucidated with  
422 the longitudinal data. It was reported that MMP12 was upregulated after myocardial infarction,  
423 and then attenuated by endogenous inhibitors, such as tissue inhibitor of metalloproteinases  
424 (TIMPs) that provides a negative feedback loop to regulate a temporal succession of events that  
425 promote myocardial wound healing while limiting tissue damage.<sup>48</sup> MMP12 levels are  
426 temporally fine-tuned after myocardial infarction, orchestrating a series of events including  
427 inflammation, fibrosis, angiogenesis and collagen degradation in order to achieve an optimal  
428 scar formation and prevent left ventricular dysfunction and heart failure prognosis.<sup>49</sup> In our  
429 findings, we confirmed that MMP12 was a biomarker that increased expression after myocardial  
430 infarction, and activation of MMP12 reduced risk of peripheral arterial disease and ischemic  
431 stroke, but because of limitations on data availability of the exact time point when MMP12  
432 protein level was quantified after ischemic injury, we were not able to assess the temporal  
433 regulation of MMP12 during cardiac remodeling upon the injury. Further studies that include  
434 disease progression endpoints can help corroborate and extend our findings to characterize  
435 dynamic protein level changes of cardiovascular targets and biomarkers.

436

437 Concordance and differences of using *cis*- and *trans*-pQTLs as IVs in MR

438

439 Using *cis*- and *trans*-pQTLs as IVs represent fundamentally distinct principles of IV selection,  
440 thereby affecting interpretation of the forward-MR results. *cis*-pQTLs are physically proximal to  
441 sentinel variants, and therefore less likely to violate the MR assumption of pleiotropy, while  
442 *trans*-pQTLs include more IVs that provide greater statistical power and the IVs representing

443 genes that may have biological roles in regulating homeostasis of the associated proteins  
444 through signaling transduction pathways or protein-protein interaction.<sup>50</sup> Forward-MR identified  
445 221 proteins that showed significant causal effects on at least one CVD, among which 59 are  
446 common targets identified using either *cis*- or *trans*-pQTLs. One hundred twenty-nine (68.6%)  
447 targets were uniquely identified in the *trans*-pQTLs-based MR analysis, accounting for 81.7% of  
448 targets with biological annotations that implied a pathophysiological role in CVD, suggesting the  
449 value of using *trans*-pQTLs in the MR analysis for exploring novel therapeutic hypotheses.  
450 Functional follow-up analyses are needed for validating *trans*-pQTLs derived targets. On the  
451 contrary, some targets are found only in the *cis*-pQTLs-based MR analysis, for example, NOTCH1  
452 for cardiac valvular disease. NOTCH1 is a Notch receptor that releases its intracellular domain as  
453 transcription factor upon activation, which plays an essential role in cell fate determination, and  
454 cell proliferation, differentiation and apoptosis during organogenesis throughout the embryo.<sup>51</sup>  
455 Loss-of-function mutations in NOTCH1 was found to cause aortic valve disease in autosomal-  
456 dominant human pedigrees that showed a wide spectrum of developmental aortic valve  
457 anomalies and severe valve calcification.<sup>52</sup> Agonists of NOTCH1 may be able to treat calcification  
458 of the aortic valve, the third leading cause of CVD in adults. Taken together, proteomic MR with  
459 *cis*- and *trans*-pQTLs provides complementary approaches for therapeutic target identification  
460 with overlapped but unparalleled insights.

461

462 Impact of applying different methods for multiple testing correction

463

464 The forward-MR generated more targets that reached the Bonferroni-corrected significance  
465 threshold than biomarkers from the reverse-MR. We noted that Bonferroni-correction that  
466 corrected for the total number of proteins and phenotypes analyzed in the phenome-wide MR  
467 scan can be overly stringent due to intercorrelation within proteins and phenotypes. Using the  
468 Bonferroni approach controlled type 1 error with a slight loss in power, given the relatively low  
469 success rates for investigational targets passing through clinical trial development,<sup>53</sup> the strict  
470 control on false positives at the first step of target discovery can help prioritize targets for  
471 downstream development. If using a more lenient approach to adjust for multiple testing, such

472 as the Benjamini–Hochberg method of false discovery rate, we found the number of significant  
473 proteins for forward-MR increased from 221 (7.52%) to 1,349 (69.54%), for reverse-MR from 16  
474 (0.54%) to 1,045 (35.54%), while resulting in a larger number of significant findings, more of  
475 which can be false positives that require extensive functional appraisal with labor-intensive and  
476 time-consuming experiments developed on animal models. External validation using  
477 independent cohorts can validate our results on top of a stringent significance threshold  
478 applied, however, at the time when this manuscript is written up, the pQTLs we used are from  
479 the largest proteomic GWAS recently performed under the UK Biobank Pharma Proteomics  
480 Project.<sup>19</sup> Future validation is required when pQTLs from equally-powered, independent studies  
481 are available.

482

483 Benefits and limitations in incorporating multi-ancestry element in MR study

484

485 Leveraging multi-ancestry data for drug discovery can help discover novel candidate causal  
486 genes. For example, two nonsense mutations of PCSK9 first reported in humans were found in  
487 an African-American population and associated with a substantial reduction of low-density  
488 lipoprotein cholesterol.<sup>54</sup> This finding demonstrated that a lifelong inhibition of PCSK9 protected  
489 against coronary heart disease without noticeable safety issues. Multi-ancestry element has  
490 recently been increasingly incorporated in population genetic studies, such as GWAS, fine-  
491 mapping and polygenic risk score studies, but rarely applied in MR studies.<sup>55,56</sup> In our study, we  
492 identified 5 biomarkers exclusively detectable in the East Asian population, highlighting the  
493 values of leveraging multi-ancestral populations in identifying candidate causal signals. We  
494 benefited from the relatively large sample size of the Biobank Japan, one of the largest non-  
495 European population cohorts with genome-wide genetic and medical records data available,  
496 which provided adequate statistical power in constructing IVs of disease endpoints and thereby  
497 detecting significant signals in the reverse MR, while hindered from the relatively small sample  
498 size of the pQTL study in this population, limiting us from identifying more potential target  
499 signals in the forward MR.

500

501 Conclusions

502

503 Our study evaluated causal relationships between 3,000 circulating proteins and 21 CVD using  
504 biobank-scale genetic association summary statistics for proteins and phenotypes in a bi-  
505 directional MR framework. We prioritized novel candidate causal signals for CVD and  
506 interrogated their pleiotropy and specificity in a phenome-wide causality survey. This study  
507 provides human genetics-based evidence of novel candidate genes, a foundational step towards  
508 full-scale causal human biology-based drug discovery for CVD.

509

## 510 References

511

- 512 1. McClellan M, Brown N, Califf RM, Warner JJ. Call to Action: Urgent Challenges in  
513 Cardiovascular Disease: A Presidential Advisory From the American Heart Association.  
514 *Circulation*. 2019;139:e44-e54. doi: 10.1161/CIR.0000000000000652
- 515 2. Mensah GA, Wei GS, Sorlie PD, Fine LJ, Rosenberg Y, Kaufmann PG, Mussolino ME, Hsu  
516 LL, Addou E, Engelgau MM, et al. Decline in Cardiovascular Mortality: Possible Causes  
517 and Implications. *Circ Res*. 2017;120:366-380. doi: 10.1161/CIRCRESAHA.116.309115
- 518 3. Tsao CW, Aday AW, Almarzooq ZI, Anderson CAM, Arora P, Avery CL, Baker-Smith CM,  
519 Beaton AZ, Boehme AK, Buxton AE, et al. Heart Disease and Stroke Statistics-2023  
520 Update: A Report From the American Heart Association. *Circulation*. 2023;147:e93-e621.  
521 doi: 10.1161/CIR.0000000000001123
- 522 4. Olivotto I, Oreziak A, Barriales-Villa R, Abraham TP, Masri A, Garcia-Pavia P, Saberi S,  
523 Lakdawala NK, Wheeler MT, Owens A, et al. Mavacamten for treatment of symptomatic  
524 obstructive hypertrophic cardiomyopathy (EXPLORER-HCM): a randomised, double-  
525 blind, placebo-controlled, phase 3 trial. *Lancet*. 2020;396:759-769. doi: 10.1016/S0140-  
526 6736(20)31792-X
- 527 5. Peikert A, Goyal P, Vaduganathan M, Claggett BL, Kulac IJ, Miao ZM, Vardeny O,  
528 Kosiborod MN, Desai AS, Jhund PS, et al. Dapagliflozin in Heart Failure With Mildly  
529 Reduced or Preserved Ejection Fraction According to Polypharmacy Status. *JACC Heart*  
530 *Fail*. 2023. doi: 10.1016/j.jchf.2023.05.014
- 531 6. Packer M, Anker SD, Butler J, Filippatos G, Pocock SJ, Carson P, Januzzi J, Verma S, Tsutsui  
532 H, Brueckmann M, et al. Cardiovascular and Renal Outcomes with Empagliflozin in Heart  
533 Failure. *N Engl J Med*. 2020;383:1413-1424. doi: 10.1056/NEJMoa2022190



- 534 7. Anker SD, Butler J, Filippatos G, Ferreira JP, Bocchi E, Bohm M, Brunner-La Rocca HP, Choi  
535 DJ, Chopra V, Chuquiure-Valenzuela E, et al. Empagliflozin in Heart Failure with a  
536 Preserved Ejection Fraction. *N Engl J Med*. 2021;385:1451-1461. doi:  
537 10.1056/NEJMoa2107038
- 538 8. Armstrong PW, Pieske B, Anstrom KJ, Ezekowitz J, Hernandez AF, Butler J, Lam CSP,  
539 Ponikowski P, Voors AA, Jia G, et al. Vericiguat in Patients with Heart Failure and Reduced  
540 Ejection Fraction. *N Engl J Med*. 2020;382:1883-1893. doi: 10.1056/NEJMoa1915928
- 541 9. Sabatine MS, Giugliano RP, Keech AC, Honarpour N, Wiviott SD, Murphy SA, Kuder JF,  
542 Wang H, Liu T, Wasserman SM, et al. Evolocumab and Clinical Outcomes in Patients with  
543 Cardiovascular Disease. *N Engl J Med*. 2017;376:1713-1722. doi:  
544 10.1056/NEJMoa1615664
- 545 10. Robinson JG, Farnier M, Krempf M, Bergeron J, Luc G, Averna M, Stroes ES, Langslet G,  
546 Raal FJ, El Shahawy M, et al. Efficacy and safety of alirocumab in reducing lipids and  
547 cardiovascular events. *N Engl J Med*. 2015;372:1489-1499. doi:  
548 10.1056/NEJMoa1501031
- 549 11. Hwang TJ, Lauffenburger JC, Franklin JM, Kesselheim AS. Temporal Trends and Factors  
550 Associated With Cardiovascular Drug Development, 1990 to 2012. *JACC Basic Transl Sci*.  
551 2016;1:301-308. doi: 10.1016/j.jacbts.2016.03.012
- 552 12. Fordyce CB, Roe MT, Ahmad T, Libby P, Borer JS, Hiatt WR, Bristow MR, Packer M,  
553 Wasserman SM, Braunstein N, et al. Cardiovascular drug development: is it dead or just  
554 hibernating? *J Am Coll Cardiol*. 2015;65:1567-1582. doi: 10.1016/j.jacc.2015.03.016
- 555 13. Nelson MR, Tipney H, Painter JL, Shen J, Nicoletti P, Shen Y, Floratos A, Sham PC, Li MJ,  
556 Wang J, et al. The support of human genetic evidence for approved drug indications. *Nat*  
557 *Genet*. 2015;47:856-860. doi: 10.1038/ng.3314
- 558 14. Smith JG, Gerszten RE. Emerging Affinity-Based Proteomic Technologies for Large-Scale  
559 Plasma Profiling in Cardiovascular Disease. *Circulation*. 2017;135:1651-1664. doi:  
560 10.1161/CIRCULATIONAHA.116.025446
- 561 15. Ferrannini E, Manca ML, Ferrannini G, Andreotti F, Andreini D, Latini R, Magnoni M,  
562 Williams SA, Maseri A, Maggioni AP. Differential Proteomics of Cardiovascular Risk and  
563 Coronary Artery Disease in Humans. *Front Cardiovasc Med*. 2021;8:790289. doi:  
564 10.3389/fcvm.2021.790289
- 565 16. Henry A, Gordillo-Maranon M, Finan C, Schmidt AF, Ferreira JP, Karra R, Sundstrom J,  
566 Lind L, Arnlov J, Zannad F, et al. Therapeutic Targets for Heart Failure Identified Using  
567 Proteomics and Mendelian Randomization. *Circulation*. 2022;145:1205-1217. doi:  
568 10.1161/CIRCULATIONAHA.121.056663

- 569 17. Shah S, Henry A, Roselli C, Lin H, Sveinbjornsson G, Fatemifar G, Hedman AK, Wilk JB,  
570 Morley MP, Chaffin MD, et al. Genome-wide association and Mendelian randomisation  
571 analysis provide insights into the pathogenesis of heart failure. *Nat Commun*.  
572 2020;11:163. doi: 10.1038/s41467-019-13690-5
- 573 18. Rasooly D, Peloso GM, Pereira AC, Dashti H, Giambartolomei C, Wheeler E, Aung N,  
574 Ferolito BR, Pietzner M, Farber-Eger EH, et al. Genome-wide association analysis and  
575 Mendelian randomization proteomics identify drug targets for heart failure. *Nat*  
576 *Commun*. 2023;14:3826. doi: 10.1038/s41467-023-39253-3
- 577 19. Sun BB, Chiou J, Traylor M, Benner C, Hsu YH, Richardson TG, Surendran P, Mahajan A,  
578 Robins C, Vasquez-Grinnell SG, et al. Plasma proteomic associations with genetics and  
579 health in the UK Biobank. *Nature*. 2023. doi: 10.1038/s41586-023-06592-6
- 580 20. Slob EAW, Burgess S. A comparison of robust Mendelian randomization methods using  
581 summary data. *Genet Epidemiol*. 2020;44:313-329. doi: 10.1002/gepi.22295
- 582 21. Bycroft C, Freeman C, Petkova D, Band G, Elliott LT, Sharp K, Motyer A, Vukcevic D,  
583 Delaneau O, O'Connell J, et al. The UK Biobank resource with deep phenotyping and  
584 genomic data. *Nature*. 2018;562:203-209. doi: 10.1038/s41586-018-0579-z
- 585 22. Sakaue S, Kanai M, Tanigawa Y, Karjalainen J, Kurki M, Koshiha S, Narita A, Konuma T,  
586 Yamamoto K, Akiyama M, et al. A cross-population atlas of genetic associations for 220  
587 human phenotypes. *Nat Genet*. 2021;53:1415-1424. doi: 10.1038/s41588-021-00931-x
- 588 23. Tadros R, Francis C, Xu X, Vermeer AMC, Harper AR, Huurman R, Kelu Bisabu K, Walsh R,  
589 Hoorntje ET, Te Rijdt WP, et al. Shared genetic pathways contribute to risk of  
590 hypertrophic and dilated cardiomyopathies with opposite directions of effect. *Nat Genet*.  
591 2021;53:128-134. doi: 10.1038/s41588-020-00762-2
- 592 24. Cotto KC, Wagner AH, Feng YY, Kiwala S, Coffman AC, Spies G, Wollam A, Spies NC,  
593 Griffith OL, Griffith M. DGIdb 3.0: a redesign and expansion of the drug-gene interaction  
594 database. *Nucleic Acids Res*. 2018;46:D1068-D1073. doi: 10.1093/nar/gkx1143
- 595 25. Mendez D, Gaulton A, Bento AP, Chambers J, De Veij M, Felix E, Magarinos MP,  
596 Mosquera JF, Mutowo P, Nowotka M, et al. ChEMBL: towards direct deposition of  
597 bioassay data. *Nucleic Acids Res*. 2019;47:D930-D940. doi: 10.1093/nar/gky1075
- 598 26. Whirl-Carrillo M, Huddart R, Gong L, Sangkuhl K, Thorn CF, Whaley R, Klein TE. An  
599 Evidence-Based Framework for Evaluating Pharmacogenomics Knowledge for  
600 Personalized Medicine. *Clin Pharmacol Ther*. 2021;110:563-572. doi: 10.1002/cpt.2350
- 601 27. Ursu O, Holmes J, Knockel J, Bologa CG, Yang JJ, Mathias SL, Nelson SJ, Oprea TI.  
602 DrugCentral: online drug compendium. *Nucleic Acids Res*. 2017;45:D932-D939. doi:  
603 10.1093/nar/gkw993

- 604 28. Sollis E, Mosaku A, Abid A, Buniello A, Cerezo M, Gil L, Groza T, Gunes O, Hall P, Hayhurst  
605 J, et al. The NHGRI-EBI GWAS Catalog: knowledgebase and deposition resource. *Nucleic  
606 Acids Res.* 2023;51:D977-D985. doi: 10.1093/nar/gkac1010
- 607 29. Landrum MJ, Lee JM, Benson M, Brown GR, Chao C, Chitipiralla S, Gu B, Hart J, Hoffman  
608 D, Jang W, et al. ClinVar: improving access to variant interpretations and supporting  
609 evidence. *Nucleic Acids Res.* 2018;46:D1062-D1067. doi: 10.1093/nar/gkx1153
- 610 30. Rehm HL, Berg JS, Brooks LD, Bustamante CD, Evans JP, Landrum MJ, Ledbetter DH,  
611 Maglott DR, Martin CL, Nussbaum RL, et al. ClinGen--the Clinical Genome Resource. *N  
612 Engl J Med.* 2015;372:2235-2242. doi: 10.1056/NEJMSr1406261
- 613 31. Chaffin M, Papangeli I, Simonson B, Akkad AD, Hill MC, Arduini A, Fleming SJ, Melanson  
614 M, Hayat S, Kost-Alimova M, et al. Single-nucleus profiling of human dilated and  
615 hypertrophic cardiomyopathy. *Nature.* 2022;608:174-180. doi: 10.1038/s41586-022-  
616 04817-8
- 617 32. Hemani G, Zheng J, Elsworth B, Wade KH, Haberland V, Baird D, Laurin C, Burgess S,  
618 Bowden J, Langdon R, et al. The MR-Base platform supports systematic causal inference  
619 across the human phenome. *Elife.* 2018;7. doi: 10.7554/eLife.34408
- 620 33. Chen Y, Lun AT, Smyth GK. From reads to genes to pathways: differential expression  
621 analysis of RNA-Seq experiments using Rsubread and the edgeR quasi-likelihood  
622 pipeline. *F1000Res.* 2016;5:1438. doi: 10.12688/f1000research.8987.2
- 623 34. Hafemeister C, Satija R. Normalization and variance stabilization of single-cell RNA-seq  
624 data using regularized negative binomial regression. *Genome Biol.* 2019;20:296. doi:  
625 10.1186/s13059-019-1874-1
- 626 35. Nachtigall M, Nachtigall RH. The Role of Lipoprotein(a) in Cardiovascular Diseases. *JAMA.*  
627 2021;326:2078. doi: 10.1001/jama.2021.16747
- 628 36. O'Donoghue ML, Fazio S, Giugliano RP, Stroes ESG, Kanevsky E, Gouni-Berthold I, Im K,  
629 Lira Pineda A, Wasserman SM, Ceska R, et al. Lipoprotein(a), PCSK9 Inhibition, and  
630 Cardiovascular Risk. *Circulation.* 2019;139:1483-1492. doi:  
631 10.1161/CIRCULATIONAHA.118.037184
- 632 37. Tsimikas S, Karwatowska-Prokopczuk E, Gouni-Berthold I, Tardif JC, Baum SJ, Steinhagen-  
633 Thiessen E, Shapiro MD, Stroes ES, Moriarty PM, Nordestgaard BG, et al. Lipoprotein(a)  
634 Reduction in Persons with Cardiovascular Disease. *N Engl J Med.* 2020;382:244-255. doi:  
635 10.1056/NEJMoa1905239
- 636 38. Hedhli N, Kalinowski A, K SR. Cardiovascular effects of neuregulin-1/ErbB signaling: role  
637 in vascular signaling and angiogenesis. *Curr Pharm Des.* 2014;20:4899-4905. doi:  
638 10.2174/1381612819666131125151058

- 639 39. Maitusong B, Xie X, Ma YT, Fu ZY, Yang YN, Li XM, Liu F, Chen BD, Gai MT. Association  
640 between ErbB3 genetic polymorphisms and coronary artery disease in the Han and  
641 Uyghur populations of China. *Int J Clin Exp Med*. 2015;8:16520-16527.
- 642 40. Zhu L, Fang Z, Jin Y, Chang W, Huang M, Chen Y, Yao Y. Circulating ERBB3 levels are  
643 inversely associated with the risk of overweight-related hypertension: a cross-sectional  
644 study. *BMC Endocr Disord*. 2021;21:130. doi: 10.1186/s12902-021-00793-8
- 645 41. Harada E, Mizuno Y, Shono M, Maeda H, Yano N, Tokunaga Y, Yasue H. Abstract 15352:  
646 Plasma Levels of BNP are Lower in Patients With Heart failure With Preserved EF (HFpEF)  
647 as Compared With Those With Reduced EF (HFrEF). *Circulation*. 2015;132:A15352-  
648 A15352. doi: doi:10.1161/circ.132.suppl\_3.15352
- 649 42. Januzzi JL, Jr., Myhre PL. The Challenges of NT-proBNP Testing in HFpEF: Shooting Arrows  
650 in the Wind. *JACC Heart Fail*. 2020;8:382-385. doi: 10.1016/j.jchf.2020.03.003
- 651 43. Xiang M, Luo H, Wu J, Ren L, Ding X, Wu C, Chen J, Chen S, Zhang H, Yu L, et al. ADAM23  
652 in Cardiomyocyte Inhibits Cardiac Hypertrophy by Targeting FAK - AKT Signaling. *J Am  
653 Heart Assoc*. 2018;7:e008604. doi: 10.1161/JAHA.118.008604
- 654 44. Yagyu H, Chen G, Yokoyama M, Hirata K, Augustus A, Kako Y, Seo T, Hu Y, Lutz EP, Merkel  
655 M, et al. Lipoprotein lipase (LpL) on the surface of cardiomyocytes increases lipid uptake  
656 and produces a cardiomyopathy. *J Clin Invest*. 2003;111:419-426. doi: 10.1172/JCI16751
- 657 45. Zee RY, Romero JR, Gould JL, Ricupero DA, Ridker PM. Polymorphisms in the advanced  
658 glycosylation end product-specific receptor gene and risk of incident myocardial  
659 infarction or ischemic stroke. *Stroke*. 2006;37:1686-1690. doi:  
660 10.1161/01.STR.0000226994.93914.6c
- 661 46. Barbaux SC, Blankenberg S, Rupprecht HJ, Francomme C, Bickel C, Hafner G, Nicaud V,  
662 Meyer J, Cambien F, Tiret L. Association between P-selectin gene polymorphisms and  
663 soluble P-selectin levels and their relation to coronary artery disease. *Arterioscler  
664 Thromb Vasc Biol*. 2001;21:1668-1673. doi: 10.1161/hq1001.097022
- 665 47. Horiba M, Kadomatsu K, Yasui K, Lee JK, Takenaka H, Sumida A, Kamiya K, Chen S,  
666 Sakuma S, Muramatsu T, et al. Midkine plays a protective role against cardiac  
667 ischemia/reperfusion injury through a reduction of apoptotic reaction. *Circulation*.  
668 2006;114:1713-1720. doi: 10.1161/CIRCULATIONAHA.106.632273
- 669 48. Mouton AJ, Rivera Gonzalez OJ, Kaminski AR, Moore ET, Lindsey ML. Matrix  
670 metalloproteinase-12 as an endogenous resolution promoting factor following  
671 myocardial infarction. *Pharmacol Res*. 2018;137:252-258. doi:  
672 10.1016/j.phrs.2018.10.026

- 673 49. DeLeon-Pennell KY, Meschiari CA, Jung M, Lindsey ML. Matrix Metalloproteinases in  
674 Myocardial Infarction and Heart Failure. *Prog Mol Biol Transl Sci.* 2017;147:75-100. doi:  
675 10.1016/bs.pmbts.2017.02.001
- 676 50. Zheng J, Haberland V, Baird D, Walker V, Haycock PC, Hurle MR, Gutteridge A, Erola P, Liu  
677 Y, Luo S, et al. Phenome-wide Mendelian randomization mapping the influence of the  
678 plasma proteome on complex diseases. *Nat Genet.* 2020;52:1122-1131. doi:  
679 10.1038/s41588-020-0682-6
- 680 51. Southgate L, Sukalo M, Karountzos ASV, Taylor EJ, Collinson CS, Ruddy D, Snape KM,  
681 Dallapiccola B, Tolmie JL, Joss S, et al. Haploinsufficiency of the NOTCH1 Receptor as a  
682 Cause of Adams-Oliver Syndrome With Variable Cardiac Anomalies. *Circ Cardiovasc*  
683 *Genet.* 2015;8:572-581. doi: 10.1161/CIRCGENETICS.115.001086
- 684 52. Garg V, Muth AN, Ransom JF, Schluterman MK, Barnes R, King IN, Grossfeld PD,  
685 Srivastava D. Mutations in NOTCH1 cause aortic valve disease. *Nature.* 2005;437:270-  
686 274. doi: 10.1038/nature03940
- 687 53. Plenge RM, Scolnick EM, Altshuler D. Validating therapeutic targets through human  
688 genetics. *Nat Rev Drug Discov.* 2013;12:581-594. doi: 10.1038/nrd4051
- 689 54. Cohen JC, Boerwinkle E, Mosley TH, Jr., Hobbs HH. Sequence variations in PCSK9, low  
690 LDL, and protection against coronary heart disease. *N Engl J Med.* 2006;354:1264-1272.  
691 doi: 10.1056/NEJMoa054013
- 692 55. Zhao H, Rasheed H, Nost TH, Cho Y, Liu Y, Bhatta L, Bhattacharya A, Global Biobank Meta-  
693 analysis I, Hemani G, Davey Smith G, et al. Proteome-wide Mendelian randomization in  
694 global biobank meta-analysis reveals multi-ancestry drug targets for common diseases.  
695 *Cell Genom.* 2022;2:None. doi: 10.1016/j.xgen.2022.100195
- 696 56. Zheng J, Zhang Y, Zhao H, Liu Y, Baird D, Karim MA, Ghousaini M, Schwartzentruber J,  
697 Dunham I, Elsworth B, et al. Multi-ancestry Mendelian randomization of omics traits  
698 revealing drug targets of COVID-19 severity. *EBioMedicine.* 2022;81:104112. doi:  
699 10.1016/j.ebiom.2022.104112  
700
